# Supplementary material for: Precision psychiatry with immunological and cognitive biomarkers: a multi-domain prediction for the diagnosis of bipolar disorder or schizophrenia using machine learning
Source: PubMed Central journal article supplement (PMC7246255; doi:10.1038/s41398-020-0836-4), 2020-05-24
Supplement: 41398_2020_836_MOESM1_ESM.pdf [file 41398_2020_836_MOESM1_ESM.pdf]

**Diagnosis of Bipolar Disorder and Schizophrenia with blood-based biomarkers and neurocognition:  
A multi-domain approach using machine learning**

Brisa S. Fernandes <sup>1 #,\*</sup>, Chandan Karmakar <sup>2,3 #</sup>, Ryad Tamouza <sup>4,5</sup>, Truyen Tran <sup>3</sup>, John Yearwood <sup>2</sup>, Nora Hamdani <sup>4</sup>, Hakim Laouamri <sup>5</sup>, Jean-Romain Richard <sup>4,5</sup>, Robert Yolken <sup>6</sup>, Michael Berk <sup>1,7,8</sup>, Svetha Venkatesh <sup>3</sup>, Marion Leboyer <sup>4,5 \*</sup>

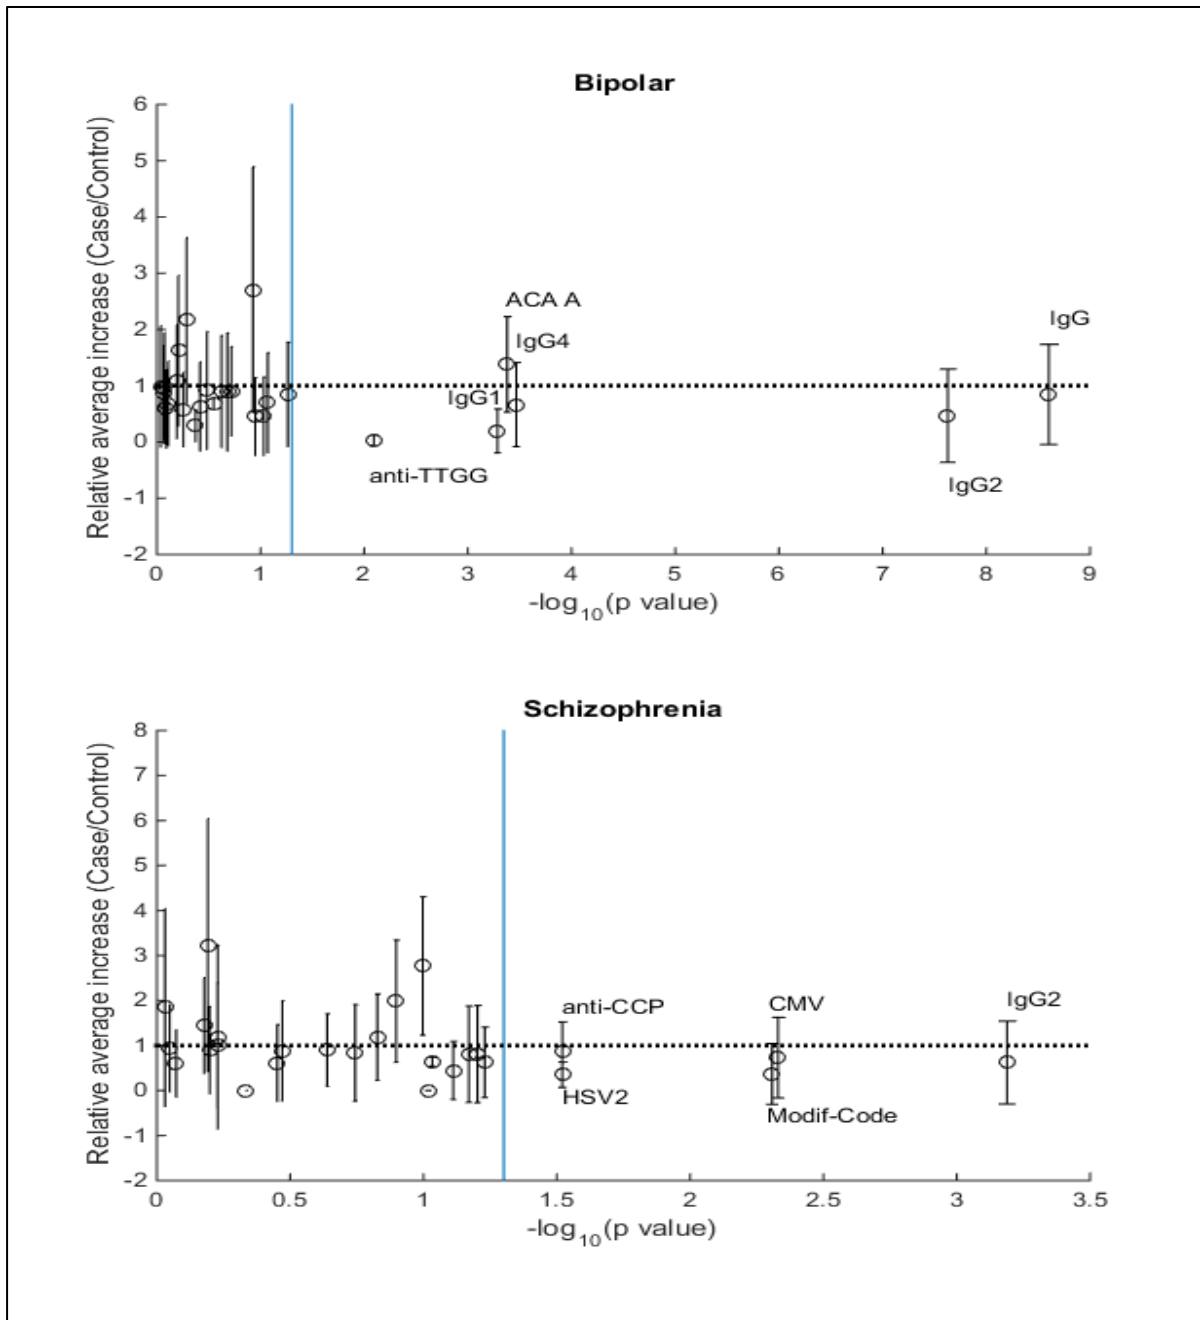

**Figure S1.** Relative change of blood-based markers in bipolar disorder or schizophrenia against their p-values. Plot of relative changes for measured analytes in bipolar disorder and schizophrenia. The Y axis reports the relative increase (or decrease) as the ratio (and the confidence against their p-values interval) based on analysis of log-transformed data from cases/controls. Reference vertical line corresponds to p-value threshold at a 5% significance level.

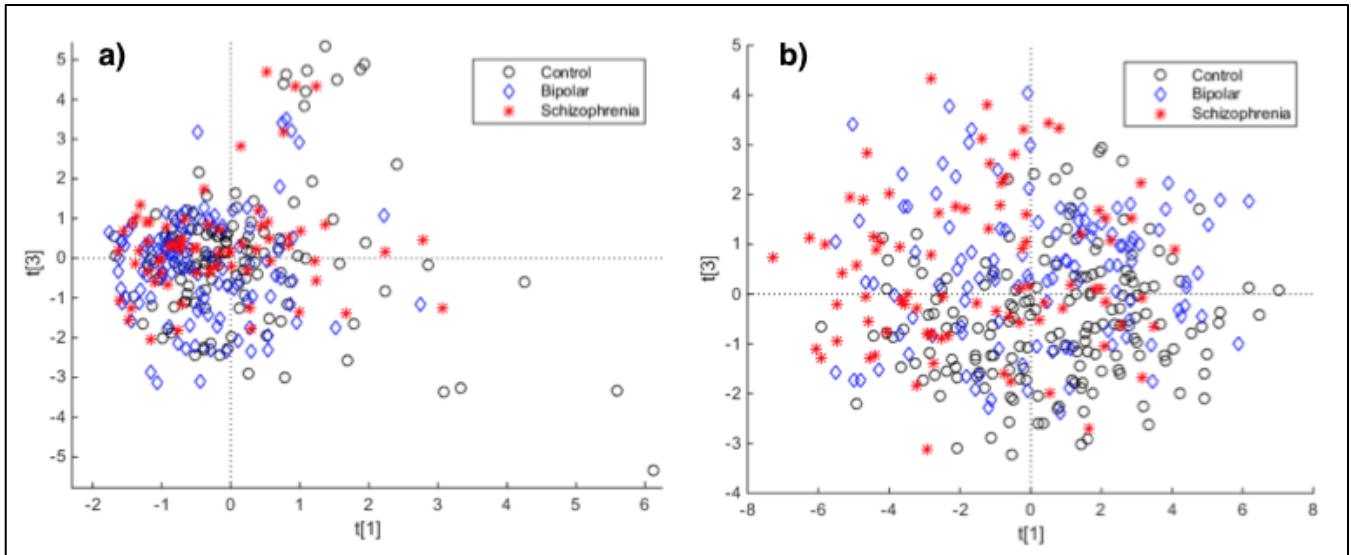

**Figure S2.** PCA plot showing distribution of samples from control, schizophrenia and bipolar disorder. **a)** PCA plot of blood-based markers, where 1<sup>st</sup> and 3<sup>rd</sup> components of the model are shown. Components are chosen to show better discriminatory performance. **b)** PCA plot of cognitive markers, where 1<sup>st</sup> and 3<sup>rd</sup> components of the model are shown. Components are chosen to show better discriminatory performance.  $t[1]$ , first component;  $t[3]$ , third component.

**Table S1.** Peripheral blood-based and cognitive biomarkers analysed and their Area Under the Curve (AUC) for discriminating bipolar disorder from controls, schizophrenia from controls, and bipolar disorder from schizophrenia.

| Biomarkers                                                 | BD<br>N=98     | SZ<br>N=58     | CT<br>N=123    | p      | AUC<br>BD vs. CT | AUC<br>SZ vs. CT | AUC<br>BP vs. SZ |
|------------------------------------------------------------|----------------|----------------|----------------|--------|------------------|------------------|------------------|
| <b>Blood-based Biomarkers</b>                              |                |                |                |        |                  |                  |                  |
| <b>Continuous Biomarkers</b>                               |                |                |                |        |                  |                  |                  |
| C-Reactive protein (CRP)                                   | 4.56(26.66)    | 4.41(29.94)    | 4.96(27.73)    | 0.845  | 0.67             | 0.50             | 0.65             |
| Immunoglobulin G (IgG)                                     | 10.13(2.05)    | 12.05(2.44)    | 12.16(2.49)    | <0.001 | 0.74             | 0.53             | 0.67             |
| Immunoglobulin G Subclass 1 (IgG1)                         | 5.18(2.38)     | 6.79(2.31)     | 6.36(2.74)     | <0.001 | 0.70             | 0.54             | 0.72             |
| Immunoglobulin G Subclass 2 (IgG2)                         | 3.65(2.1.48)   | 3.70(2.28)     | 4.21(2.41)     | 0.007  | 0.62             | 0.60             | 0.53             |
| Immunoglobulin G Subclass 3 (IgG3)                         | 686.39(275.38) | 701.47(219.99) | 743.79(265.78) | 0.477  | 0.55             | 0.52             | 0.53             |
| Immunoglobulin G Subclass 4 (IgG4)                         | 339.54(220.72) | 441.77(230.09) | 383.09(250.03) | 0.185  | 0.53             | 0.57             | 0.61             |
| Immunoglobulin M (IgM)                                     | 1.03(2.44)     | 0.97(2.43)     | 1.53(2.45)     | 0.338  | 0.54             | 0.57             | 0.53             |
| <b>Categorical Biomarkers</b>                              |                |                |                |        |                  |                  |                  |
| Anti-nuclear factor (ANF)                                  | 45.92(45/98)   | 29.31(17/58)   | 42.28(52/123)  | 0.107  | 0.50             | 0.57             | 0.58             |
| Antibodies anti-DNA (anti-DNA)                             | 8.16(2/98)     | 3.45(2/58)     | 3.25(4/123)    | 0.172  | 0.53             | 0.51             | 0.52             |
| Antibodies anti-DNA (anti-DNA)                             | 2.04(2/98)     | 1.72(1/58)     | 3.25(4/123)    | 0.821  | 0.51             | 0.50             | 0.51             |
| Soluble extractable nuclear antigens antibodies (anti-ENA) | 1.02(1/98)     | 1.72(1/58)     | 1.63(2/123)    | 0.921  | 0.50             | 0.51             | 0.50             |
| Anti-neutrophil cytoplasmic antibodies (ANCA)              | 9.18(9/98)     | 5.17(3/58)     | 6.50(8/123)    | 0.744  | 0.51             | 0.50             | 0.51             |
| Anti-cardiolipin antibodies (ACA)                          | 3.06(3/98)     | 10.34(6/58)    | 17.89(22/123)  | 0.001  | 0.57             | 0.54             | 0.54             |
| Anti-cardiolipin antibodies (AMA)                          | 3.06(3/98)     | 3.45(2/58)     | 8.13(7/123)    | 0.193  | 0.53             | 0.52             | 0.50             |
| Beta-2 glycoprotein 1 antibodies (anti-beta2gp1G)          | 1.02(1/98)     | 0.00(0/58)     | 0.00(0/123)    | 0.350  | 0.51             | 0.50             | 0.51             |
| Beta-2 glycoprotein 1 antibodies (anti-beta2gp1M)          | 3.06(3/98)     | 0.00(0/58)     | 3.25(4/123)    | 0.191  | 0.50             | 0.52             | 0.52             |
| Rheumatoid factor (RF)                                     | 19.39(19/98)   | 25.86(15/58)   | 30.08(37/123)  | 0.176  | 0.55             | 0.51             | 0.54             |
| Anti-citrullinated protein antibodies (anti-CCP)           | 7.14(7/98)     | 18.97(11/58)   | 6.50(8/123)    | 0.071  | 0.51             | 0.55             | 0.56             |
| Anti-myelin antibodies (anti-Myelin)                       | 0.00(0/98)     | 1.72(1/58)     | 0.00(0/123)    | 0.344  | 0.52             | 0.50             | 0.53             |
| Anti-myelin associated glycoprotein antibodies (anti-MAG)  | 1.02(1/98)     | 0.00(0/58)     | 1.63(2/123)    | 0.385  | 0.53             | 0.51             | 0.51             |
| Anti-tissue transglutaminase (anti-TTG)                    | 1.02(1/98)     | 3.45(2/58)     | 1.63(2/123)    | 0.081  | 0.53             | 0.51             | 0.52             |
| <b>Antibodies anti-Gliadin (anti-Gliadin)</b>              | 3.06(3/98)     | 10.34(6/58)    | 3.25(4/123)    | 0.034  | 0.51             | 0.54             | 0.55             |
| Herpes simplex virus 1 (HSV1)                              | 64.29(63/98)   | 56.90(33/58)   | 68.29(84/123)  | 0.331  | 0.52             | 0.56             | 0.54             |
| Herpes simplex virus 2 (HSV2)                              | 23.47(23/98)   | 8.62(5/58)     | 26.83(33/123)  | 0.010  | 0.52             | 0.59             | 0.57             |
| Cytomegalovirus (CMV)                                      | 58.16(57/98)   | 55.17(32/58)   | 67.48(83/123)  | 0.190  | 0.55             | 0.56             | 0.51             |
| Toxoplasma Gondii IgG                                      | 79.59(78/98)   | 63.79(37/58)   | 56.10(69/123)  | 0.001  | 0.62             | 0.54             | 0.58             |
